# Supplementary material
Source: publisher figshare collection journal article supplement (https://asha.figshare.com/articles/dataset/_/21313689)
Supplement: Supplementary file 2 [file 1]

## Supplemental Material S2. Linear mixed model details.

### *Western Aphasia Battery–Revised Aphasia Quotient*

| Fixed Effects     | Test Period                  | Estimate | SE           | 95% CI        | t      | p      |
|-------------------|------------------------------|----------|--------------|---------------|--------|--------|
|                   | Initial                      | 50.862   | 5.042        | 40.516-61.209 | 10.088 | < .001 |
|                   | 1-year                       | 58.959   | 5.042        | 48.613-69.305 | 11.694 | < .001 |
|                   | 2-year                       | 61.151   | 5.090        | 50.723-71.579 | 12.013 | < .001 |
| Time Period       | Mean dif                     | SE       | CI           | p             |        |        |
| Pairwise          |                              |          |              |               |        |        |
| Comparisons       |                              |          |              |               |        |        |
| Initial to 1-year | 8.096                        | 1.202    | 5.103-11.09  | < .001        |        |        |
| 1-year to 2-year  | 2.192                        | 1.391    | -1.269-5.653 | .367          |        |        |
| Initial to 2-year | 10.288                       | 1.723    | 5.853-14.724 | < .001        |        |        |
| Random Effects    | Participant Intercept        | 618.140  |              |               |        |        |
| Model             | -2 Restricted Log Likelihood | 544.814  |              |               |        |        |

### *An Object and Action Battery Items (N = 40)*

| All Subject and Reunion Battery Items (N = 10) |                              |          |             |             |       |        |
|------------------------------------------------|------------------------------|----------|-------------|-------------|-------|--------|
| Fixed Effects                                  | Test Period                  | Estimate | SE          | 95% CI      | t     | p      |
|                                                | Initial                      | 0.412    | 0.073       | 0.260-0.565 | 5.583 | < .001 |
|                                                | 1-year                       | 0.49     | 0.073       | 0.337-0.642 | 6.632 | < .001 |
|                                                | 2-year                       | 0.521    | 0.074       | 0.368-0.675 | 7.002 | < .001 |
| Time Period                                    | Mean dif                     | SE       | CI          | p           |       |        |
| Pairwise                                       |                              |          |             |             |       |        |
| Comparisons                                    |                              |          |             |             |       |        |
| Initial to 1-year                              | 0.078                        | 0.018    | 0.031-0.124 | < .001      |       |        |
| 1-year to 2-year                               | 0.031                        | 0.021    | 0.02-0.083  | .407        |       |        |
| Initial to 2-year                              | 0.109                        | 0.026    | 0.041-0.177 | .001        |       |        |
| Random Effects                                 | Participant Intercept        | 0.118    |             |             |       |        |
| Model                                          | -2 Restricted Log Likelihood | -54.087  |             |             |       |        |

*The Aphasia Communication Outcome Measure (ACOM)*

| Fixed Effects        | Test Period                  | Estimate | SE            | 95% CI        | <i>t</i> | <i>p</i> |
|----------------------|------------------------------|----------|---------------|---------------|----------|----------|
|                      | Initial                      | 46.827   | 2.245         | 42.332-51.323 | 20.85    | < .001   |
|                      | 1-year                       | 56.291   | 2.160         | 51.965-60.618 | 26.053   | < .001   |
|                      | 2-year                       | 52.473   | 2.388         | 47.697-57.251 | 21.966   | < .001   |
| Time Period          | Mean dif                     | SE       | CI            | <i>p</i>      |          |          |
| Pairwise Comparisons |                              |          |               |               |          |          |
| Initial to 1-year    | 9.464                        | 2.571    | 3.029-15.899  | .002          |          |          |
| 1-year to 2-year     | -3.818                       | 2.721    | -10.602-2.966 | .504          |          |          |
| Initial to 2-year    | 5.646                        | 3.042    | -2.114-13.406 | .223          |          |          |
| Random Effects       | Participant Intercept        | 13.694   |               |               |          |          |
| Model                | -2 Restricted Log Likelihood | 498.695  |               |               |          |          |

*Assessment of Living with Aphasia (ALA)*

| Fixed Effects        | Test Period                  | Estimate | SE           | 95% CI      | <i>t</i> | <i>p</i> |
|----------------------|------------------------------|----------|--------------|-------------|----------|----------|
|                      | Initial                      | 2.206    | 0.097        | 2.011-2.401 | 22.73    | < .001   |
|                      | 1-year                       | 2.757    | 0.098        | 2.560-2.955 | 28.001   | < .001   |
|                      | 2-year                       | 2.970    | 0.113        | 2.744-3.198 | 26.21    | < .001   |
| Time Period          | Mean dif                     | SE       | CI           | <i>p</i>    |          |          |
| Pairwise Comparisons |                              |          |              |             |          |          |
| Initial to 1-year    | 0.551                        | 0.112    | 0.27-0.832   | < .001      |          |          |
| 1-year to 2-year     | 0.213                        | 0.126    | -0.101-0.528 | .294        |          |          |
| Initial to 2-year    | 0.764                        | 0.141    | 0.417-1.111  | < .001      |          |          |
| Random Effects       | Participant Intercept        | 0        |              |             |          |          |
| Model                | -2 Restricted Log Likelihood | 86.976   |              |             |          |          |

*Communication Effectiveness Index (CETI)*

| Fixed Effects        | Test Period                  | Estimate  | <i>SE</i>    | 95% CI        | <i>t</i> | <i>p</i> |
|----------------------|------------------------------|-----------|--------------|---------------|----------|----------|
|                      | Initial                      | 46.729    | 2.047        | 42.598-50.860 | 22.822   | < .001   |
|                      | 1-year                       | 59.195    | 2.138        | 54.891-63.499 | 27.686   | < .001   |
|                      | 2-year                       | 60.020    | 2.485        | 55.038-65.003 | 24.149   | < .001   |
| Time Period          | Mean dif                     | <i>SE</i> | CI           | <i>p</i>      |          |          |
| Pairwise Comparisons |                              |           |              |               |          |          |
| Initial to 1-year    | 12.465                       | 2.028     | 7.352-17.578 | < .001        |          |          |
| 1-year to 2-year     | 0.825                        | 2.41      | -5.212-6.863 | 1             |          |          |
| Initial to 2-year    | 13.291                       | 2.452     | 6.98-19.601  | < .001        |          |          |
| Random Effects       | Participant Intercept        | 56.36653  |              |               |          |          |
| Model                | -2 Restricted Log Likelihood | 453.78    |              |               |          |          |

*Average Number of Words in Discourse*

| Average Number of Words and Discourse |                              |          |                |                 |          |          |
|---------------------------------------|------------------------------|----------|----------------|-----------------|----------|----------|
| Fixed Effects                         | Test Period                  | Estimate | SE             | 95% CI          | <i>t</i> | <i>p</i> |
|                                       | Initial                      | 127.509  | 24.019         | 78.851-176.167  | 5.309    | < .001   |
|                                       | 1-year                       | 135.248  | 24.019         | 86.590-183.906  | 5.631    | < .001   |
|                                       | 2-year                       | 194.590  | 24.019         | 145.932-243.249 | 8.102    | < .001   |
| Time Period                           | Mean dif                     | SE       | CI             | <i>p</i>        |          |          |
| Pairwise Comparisons                  |                              |          |                |                 |          |          |
| Initial to 1-year                     | 7.739                        | 15.7     | -31.142-46.62  | 1               |          |          |
| 1-year to 2-year                      | 59.343                       | 15.7     | 20.461-98.224  | .001            |          |          |
| Initial to 2-year                     | 67.081                       | 20.686   | 14.748-119-415 | .008            |          |          |
| Random Effects                        | Participant Intercept        | 2968.643 |                |                 |          |          |
| Model                                 | -2 Restricted Log Likelihood | 934.101  |                |                 |          |          |

*Percentage of Correct Information Units (%CIU) in Discourse*

| Fixed Effects        | Test Period                  | Estimate  | <i>SE</i>    | 95% CI        | <i>t</i> | <i>p</i> |
|----------------------|------------------------------|-----------|--------------|---------------|----------|----------|
|                      | Initial                      | 29.632    | 4.662        | 19.978-39.287 | 6.356    | < .001   |
|                      | 1-year                       | 31.531    | 4.685        | 21.839-41.224 | 6.729    | < .001   |
|                      | 2-year                       | 39.174    | 4.811        | 29.269-49.079 | 8.141    | < .001   |
| Time Period          | Mean dif                     | <i>SE</i> | CI           | <i>p</i>      |          |          |
| Pairwise Comparisons |                              |           |              |               |          |          |
| Initial to 1-year    | 1.899                        | 2.184     | -3.665-7.462 | 1             |          |          |
| 1-year to 2-year     | -7.643                       | 2.445     | 1.457-13.829 | .011          |          |          |
| Initial to 2-year    | 9.541                        | 2.467     | 3.09-15.993  | .003          |          |          |
| Random Effects       | Participant Intercept        | 407.446   |              |               |          |          |
| Model                | -2 Restricted Log Likelihood | 427.05    |              |               |          |          |

*Percentage of Utterances with Relevant and Accurate Subject, Verb and Object (%REL) in Discourse*

| Fixed Effects        | Test Period                  | Estimate   | SE            | 95% CI        | <i>t</i> | <i>p</i> |
|----------------------|------------------------------|------------|---------------|---------------|----------|----------|
|                      | Initial                      | 33.015     | 5.488         | 21.640-44.391 | 6.016    | < .001   |
|                      | 1-year                       | 39.264     | 5.514         | 27.846-50.682 | 7.121    | < .001   |
|                      | 2-year                       | 41.502     | 5.591         | 29.957-53.048 | 7.422    | < .001   |
| Time Period          | Mean dif                     | SE         | CI            | <i>p</i>      |          |          |
| Pairwise Comparisons |                              |            |               |               |          |          |
| Initial to 1-year    | 6.249                        | 2.515      | -0.236-12.733 | .062          |          |          |
| 1-year to 2-year     | 2.238                        | 2.706      | -4.66-9.136   | 1             |          |          |
| Initial to 2-year    | 8.487                        | 2.106      | 2.863-14.11   | .003          |          |          |
| Random Effects       | Participant Intercept        | 588.973664 |               |               |          |          |
| Model                | -2 Restricted Log Likelihood | 436.298    |               |               |          |          |

*Correct Information Units Per Minute (CIUs/min) in Discourse*

| Fixed Effects     | Test Period                  | Estimate | SE           | 95% CI      | <i>t</i> | <i>p</i> |
|-------------------|------------------------------|----------|--------------|-------------|----------|----------|
|                   | Initial                      | 1.106    | 0.117        | 0.860-1.35  | 9.386    | < .001   |
|                   | 1-year                       | 1.172    | 0.117        | 0.926-1.418 | 9.939    | < .001   |
|                   | 2-year                       | 1.248    | 0.119        | 1.000-1.497 | 10.475   | < .001   |
| Time Period       | Mean dif                     | SE       | CI           | <i>p</i>    |          |          |
| Pairwise          |                              |          |              |             |          |          |
| Comparisons       |                              |          |              |             |          |          |
| Initial to 1-year | 0.065                        | 0.033    | -0.02-0.15   | .184        |          |          |
| 1-year to 2-year  | 0.077                        | 0.038    | -0.019-0.172 | .152        |          |          |
| Initial to 2-year | 0.142                        | 0.04     | 0.036-0.247  | .007        |          |          |
| Random Effects    | Participant Intercept        | 0.265    |              |             |          |          |
| Model             | -2 Restricted Log Likelihood | 3.229    |              |             |          |          |

*Percentage of Complete Utterances (%CUs) in Discourse*

| Fixed Effects     | Test Period                  | Estimate | SE           | 95% CI      | <i>t</i> | <i>p</i> |
|-------------------|------------------------------|----------|--------------|-------------|----------|----------|
|                   | Initial                      | 1.045    | 0.158        | 0.717-1.373 | 6.597    | < .001   |
|                   | 1-year                       | 1.100    | 0.158        | 0.772-1.428 | 6.948    | < .001   |
|                   | 2-year                       | 1.09     | 0.164        | 0.755-1.429 | 6.679    | < .001   |
| Time Period       | Mean dif                     | SE       | CI           | <i>p</i>    |          |          |
| Pairwise          |                              |          |              |             |          |          |
| Comparisons       |                              |          |              |             |          |          |
| Initial to 1-year | 0.056                        | 0.074    | -0.131-0.243 | 1.0         |          |          |
| 1-year to 2-year  | 0.008                        | 0.084    | -0.205-0.221 | 1.0         |          |          |
| Initial to 2-year | 0.048                        | 0.101    | -0.310-0.215 | 1.0         |          |          |
| Random Effects    | Participant Intercept        | 0.379    |              |             |          |          |
| Model             | -2 Restricted Log Likelihood | 67.812   |              |             |          |          |
